# Supplementary material for: Urinary Metabolomics Study on the Protective Role of Cocoa in Zucker Diabetic Rats via 1H-NMR-Based Approach
Source: MDPI journal article supplement (doi:10.3390/nu14194127), 2022-10-04
Supplement: s1 [file s1]

**Supporting information:**

**Urinary metabolomics study on the protective role of cocoa in Zucker diabetic rats via  $^1\text{H}$ -NMR-based approach**

Elisa Fernández-Millán<sup>1,2</sup>, Sonia Ramos<sup>3</sup>, David Álvarez-Cilleros<sup>3</sup>, Sara Samino<sup>2,4</sup>, Nuria Amigó<sup>2,4,5</sup>, Xavier Correig<sup>2,4,6</sup>, Monica Chagoyen<sup>7</sup>, Carmen Álvarez<sup>1,2</sup>, María Ángeles Martín<sup>2,3</sup>.

**Supplementary table S1.** Composition of the experimental control and cocoa-rich diets.

| Component (g/Kg dry weight)             | Control | Cocoa |
|-----------------------------------------|---------|-------|
| Casein                                  | 140     | 140   |
| Dextrose                                | 155     | 155   |
| Sucrose                                 | 100     | 100   |
| Fat                                     | 40      | 40    |
| t-BHQ ( <i>tert</i> -butylhydroquinone) | 0.008   | 0.008 |
| Mineral mix.                            | 35      | 35    |
| Vitamin mix.                            | 10      | 10    |
| L-Cys                                   | 1.8     | 1.8   |
| Cholin bitartrate                       | 2.5     | 2.5   |
| Cellulose                               | 100     | 66    |
| Starch                                  | 415.7   | 349.7 |
| Cocoa powder                            | -       | 100   |
| Energy (KJ/Kg diet)                     | 15048   | 15048 |

**Supplementary table S2.** Metabolites identified in the urine of lean and diabetic rats.

|                          |                             |
|--------------------------|-----------------------------|
| L-Alanine                | <a href="#">HMDB0000161</a> |
| Dimethylamine            | <a href="#">HMDB0000087</a> |
| Formic acid              | <a href="#">HMDB0000142</a> |
| D-Glucose                | <a href="#">HMDB0000122</a> |
| 1-Methylnicotinamide     | <a href="#">HMDB0000699</a> |
| Azelaic acid             | <a href="#">HMDB0000784</a> |
| Suberic acid             | <a href="#">HMDB0000893</a> |
| Pimelic acid             | <a href="#">HMDB0000857</a> |
| Urea                     | <a href="#">HMDB0000294</a> |
| Tartaric acid            | <a href="#">HMDB0000956</a> |
| Pyruvic acid             | <a href="#">HMDB0000243</a> |
| Choline                  | <a href="#">HMDB0000097</a> |
| Acetic acid              | <a href="#">HMDB0000042</a> |
| Phosphorylcholine        | <a href="#">HMDB0001565</a> |
| Creatinine               | <a href="#">HMDB0000562</a> |
| Acetoacetic acid         | <a href="#">HMDB0000060</a> |
| Hydroxyphenyllactic acid | <a href="#">HMDB0000755</a> |
| Oxoglutaric acid         | <a href="#">HMDB0000208</a> |
| Creatine                 | <a href="#">HMDB0000064</a> |
| Indoxyl sulfate          | <a href="#">HMDB0000682</a> |
| D_Unknow 3               | -                           |
| D_Unknow 4               | -                           |
| Phenylacetyl glycine     | <a href="#">HMDB0000821</a> |
| Sucrose                  | <a href="#">HMDB0000258</a> |
| Nicotinamide N-oxide     | <a href="#">HMDB0002730</a> |
| L-Lactic acid            | <a href="#">HMDB0000190</a> |
| L-Threonine              | <a href="#">HMDB0000167</a> |
| L-Valine                 | <a href="#">HMDB0000883</a> |
| L-Leucine                | <a href="#">HMDB0000687</a> |
| L-Isoleucine             | <a href="#">HMDB0000172</a> |
| Hippuric acid            | <a href="#">HMDB0000714</a> |
| Ketoleucine              | <a href="#">HMDB0000695</a> |

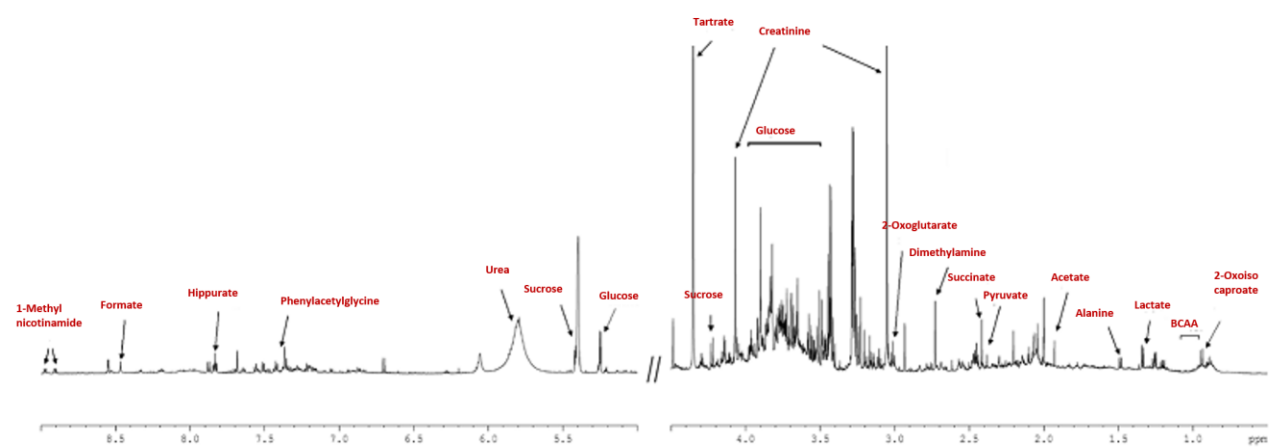

**Figure S1.** Representative 600-MHz <sup>1</sup>H-NMR spectrum of a urine sample including metabolite assignment.
